# Supplementary material for: In situgrowth of 2D ZnIn2S4nanosheets on sulfur-doped porous Ti3C2TxMXene 3D multi-functional architectures for photocatalytic H2evolution
Source: Royal Society of Chemistry journal article supplement (doi:10.1039/d2tc01955h), 2022-01-01
Supplement: d2tc01955h1.pdf [file d2tc01955h1.pdf]

## Supporting Information

### 2D ZnIn<sub>2</sub>S<sub>4</sub> nanosheets in-situ growth on sulfur-doped porous Ti<sub>3</sub>C<sub>2</sub>T<sub>x</sub> MXene 3D multi-functional architectures for photocatalytic H<sub>2</sub> evolution

Ming Du,<sup>a</sup> Lutao Li,<sup>a</sup> Shilei Ji,<sup>a</sup> Taomiao Wang,<sup>a</sup> Yile Wang,<sup>a</sup> Jian Zhang,<sup>\*a, b</sup> Xing'ao Li,<sup>\*a, b</sup>

Dr. Ming Du, Lutao Li, Dr. Shilei Ji, Taomiao Wang Dr. Yile Wang, Prof. Jian Zhang, Prof. Xing'ao Li.

<sup>a</sup> Key Laboratory for Organic Electronics and Information Displays & Institute of Advanced Materials (IAM), Jiangsu National Synergetic Innovation Center for Advanced Materials (SICAM), Nanjing University of Posts & Telecommunications, Nanjing 210023, PR China  
Email: lxahbmy@126.com; iamjzhang@njupt.edu.cn.

<sup>b</sup> New Energy Technology Engineering Lab of Jiangsu Province, School of Science, Nanjing University of Posts & Telecommunications (NUPT), Nanjing 210023, PR China

Keywords: porous Ti<sub>3</sub>C<sub>2</sub>T<sub>x</sub>, sulfur-doped, Ti-S bonds, 3D architecture, photocatalytic H<sub>2</sub> evolution

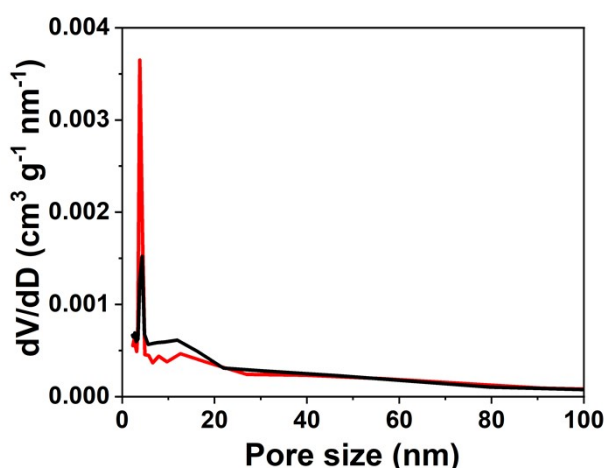

Fig. S1. The pore size distribution curves of the ZnIn<sub>2</sub>S<sub>4</sub> and S-doped Ti<sub>3</sub>C<sub>2</sub>T<sub>x</sub>@ZnIn<sub>2</sub>S<sub>4</sub> composites

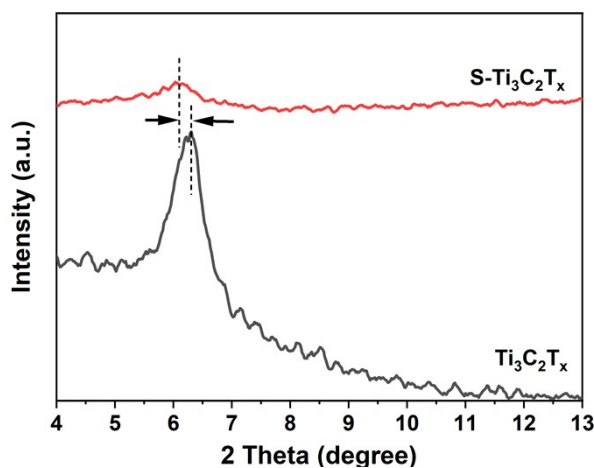

Fig. S2. X-ray diffraction patterns of  $\text{Ti}_3\text{C}_2\text{T}_x$  and S-doped  $\text{Ti}_3\text{C}_2\text{T}_x$ .

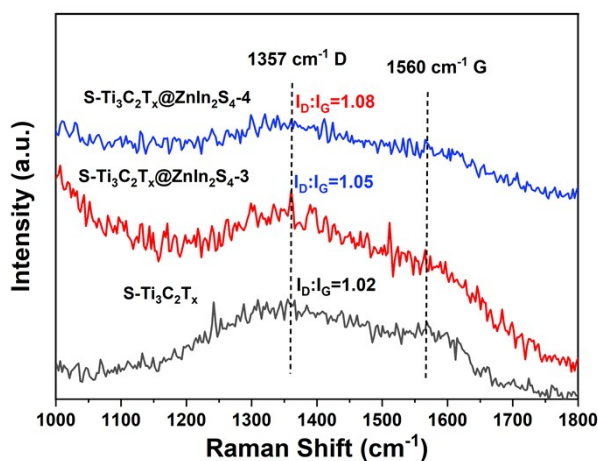

Fig. S3. Raman spectroscopy of S-doped  $\text{Ti}_3\text{C}_2\text{T}_x$  and S- $\text{Ti}_3\text{C}_2\text{T}_x$ @ZnIn<sub>2</sub>S<sub>4</sub> composites.

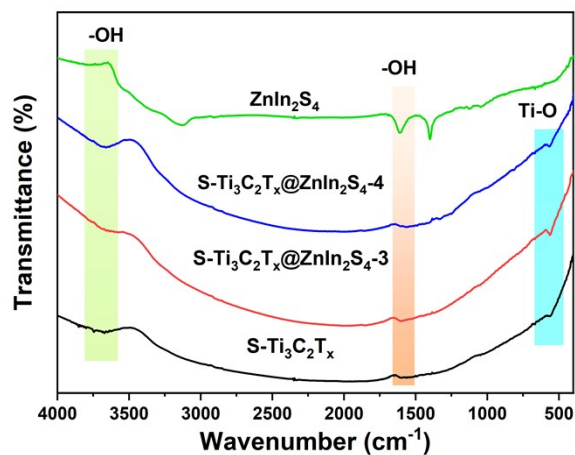

Fig. S4. FT-IR spectra of ZnIn<sub>2</sub>S<sub>4</sub>, S- $\text{Ti}_3\text{C}_2\text{T}_x$ @ZnIn<sub>2</sub>S<sub>4</sub> composites, and S-doped  $\text{Ti}_3\text{C}_2\text{T}_x$ .

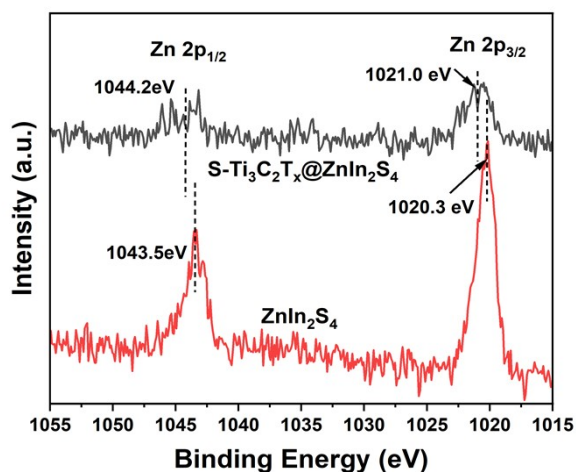

Fig. S5. Zn 2p of ZnIn<sub>2</sub>S<sub>4</sub> and S- $\text{Ti}_3\text{C}_2\text{T}_x$ @ZnIn<sub>2</sub>S<sub>4</sub> composites.

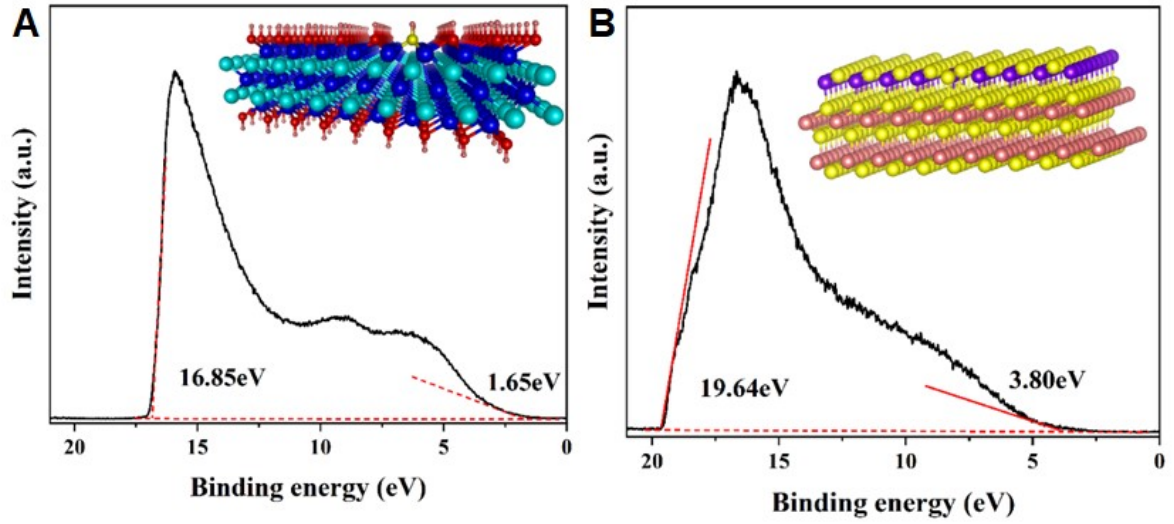

Fig. S6. UPS spectra for A) S doped  $\text{Ti}_3\text{C}_2\text{T}_x$  and B)  $\text{ZnIn}_2\text{S}_4$

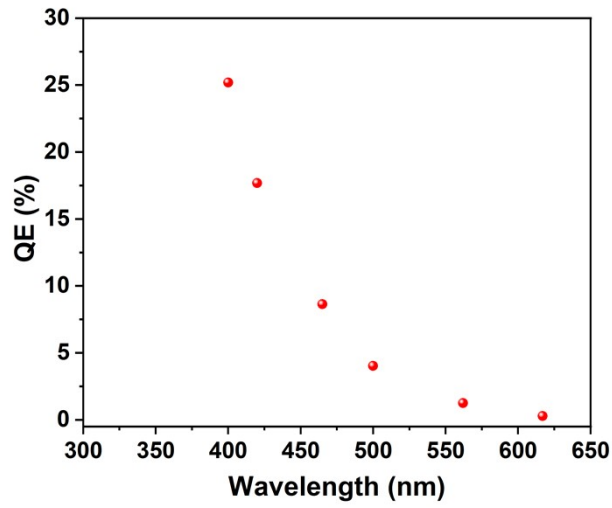

Fig. S7. The QE values of  $\text{S-Ti}_3\text{C}_2\text{T}_x@\text{ZnIn}_2\text{S}_4\text{-3}$  at different wavelength

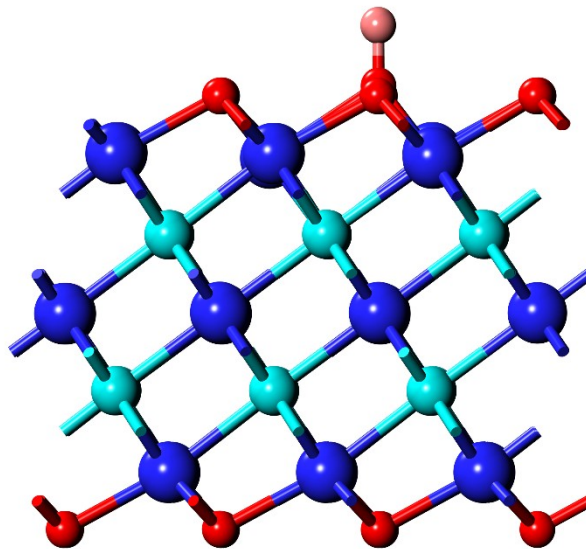

Fig. S8. Side views of the pure  $\text{Ti}_3\text{C}_2\text{T}_x$ .

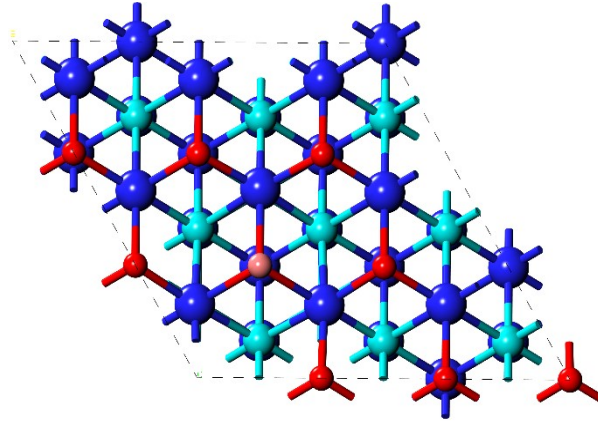

Fig. S9. Top views of the pure  $\text{Ti}_3\text{C}_2\text{T}_x$ .

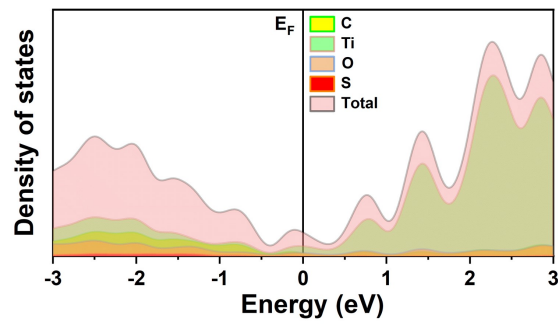

Fig. S10. Density of states of the S doped  $\text{Ti}_3\text{C}_2\text{T}_x$ .

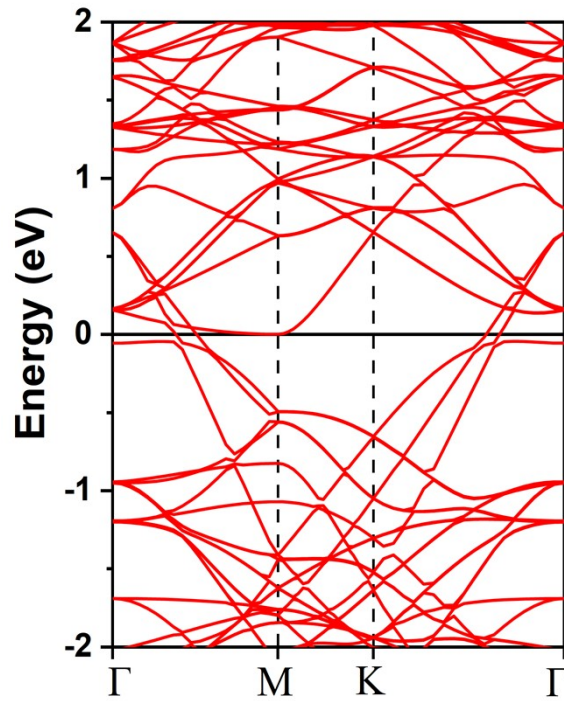

Fig. S11. The electronic band structure of the pure  $\text{Ti}_3\text{C}_2\text{T}_x$ .

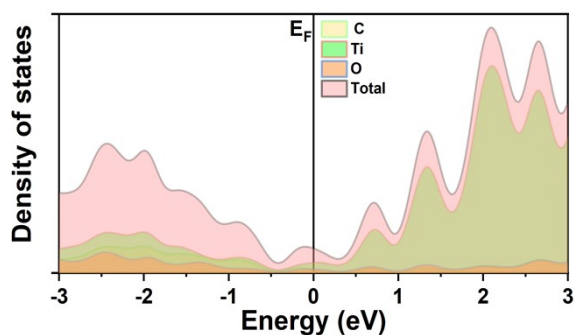

Fig. S12. The density of states of the pure  $\text{Ti}_3\text{C}_2\text{T}_x$ .

Table S1. Comparison of the photocatalytic  $\text{H}_2$  evolution activity for some previous reports photocatalysts

| Photocatalyst                                                        | Light source                                  | sacrificial agent                            | $\text{H}_2$ evolution rate ( $\text{mmol h}^{-1}\text{g}^{-1}$ ) | $\text{H}_2$ production QE (%)     | Ref. |
|----------------------------------------------------------------------|-----------------------------------------------|----------------------------------------------|-------------------------------------------------------------------|------------------------------------|------|
| $\text{CdS}/\text{Ti}_3\text{C}_2$                                   | 300 W Xe arc lamp ( $\lambda \geq 400$ nm)    | TEOA                                         | 3.1765                                                            | 2.28 ( $\lambda = 420\text{nm}$ )  | 1    |
| $\text{CuInS}_2/\text{TiO}_2$                                        | 300 W Xe lamp ( $\lambda \geq 420$ nm)        | MEOH                                         | 0.655                                                             | None                               | 2    |
| $\text{CNFs}/\text{MoS}_2/\text{ZnIn}_2\text{S}_4$                   | 300 W Xe lamp ( $\lambda \geq 400$ nm)        | aqueous solution                             | 0.151                                                             | 20.88 ( $\lambda = 365\text{nm}$ ) | 3    |
| $\text{NiCo}_2\text{S}_4/\text{ZnIn}_2\text{S}_4$                    | 300 W Xe lamp ( $\lambda \geq 400$ nm)        | $\text{Na}_2\text{S}/\text{Na}_2\text{SO}_3$ | 0.77                                                              | 1.2 ( $\lambda = 420\text{nm}$ )   | 4    |
| $\text{MXene}/\text{ZnIn}_2\text{S}_4$                               | 300 W Xe lamp ( $\lambda \geq 400$ nm)        | TEOA                                         | 3.475                                                             | 11.14 ( $\lambda = 420\text{nm}$ ) | 5    |
| $\text{BiVO}_4/\text{Ti}_3\text{C}_2$                                | 300 W Xe arc lamp ( $\lambda \geq 420$ nm)    | methanol solution                            | 0.196                                                             | 1.47 ( $\lambda = 420\text{nm}$ )  | 6    |
| $\text{ZnIn}_2\text{S}_4/\text{S}$ , N co-doped carbon               | 300 W Xe lamp                                 | TEOA                                         | 2.937                                                             | 19.47 ( $\lambda = 435\text{nm}$ ) | 7    |
| $\text{ZnIn}_2\text{S}_4\text{-S}/\text{CNTs}/\text{RP}$             | 350 W Xe lamp                                 | $\text{Na}_2\text{S}/\text{Na}_2\text{SO}_3$ | 1.640                                                             | None                               | 8    |
| $\text{CuInS}_2@\text{C}_3\text{N}_4$                                | 350 W Xe lamp ( $\lambda \geq 420$ nm).       | $\text{Na}_2\text{S}/\text{Na}_2\text{SO}_3$ | 0.373                                                             | 4.32 ( $\lambda = 400\text{nm}$ )  | 9    |
| $\text{TiO}_2/\text{Ti}_3\text{C}_2/\text{g-C}_3\text{N}_4$          | 300 W Xe lamp ( $\lambda \geq 420$ nm).       | TEOA                                         | 1.409                                                             | None                               | 10   |
| $\text{Ti}_3\text{C}_2@\text{TiO}_2/\text{ZnIn}_2\text{S}_4$         | 300 W Xe lamp ( $\lambda \geq 400$ nm)        | $\text{Na}_2\text{S}/\text{Na}_2\text{SO}_3$ | 1.186                                                             | None                               | 11   |
| $\text{CdS}/\text{ZnIn}_2\text{S}_4$                                 | 300 W Xe lamp                                 | $\text{Na}_2\text{S}/\text{Na}_2\text{SO}_3$ | 3.072                                                             | 15.9 ( $\lambda = 420\text{nm}$ )  | 12   |
| $\text{NH}_2\text{-MIL-125(Ti)} @\text{ZnIn}_2\text{S}_4/\text{CdS}$ | 300 W Xe lamp ( $\lambda \geq 400$ nm)        | lactic acid                                  | 2.367                                                             | None                               | 13   |
| $\text{WO}_3/\text{ZnIn}_2\text{S}_4$                                | 300 W Xenon arc lamp ( $\lambda \geq 420$ nm) | $\text{Na}_2\text{S}/\text{Na}_2\text{SO}_3$ | 1.945                                                             | 18.68 ( $\lambda = 420\text{nm}$ ) | 14   |

|                                                                                   |                                           |                                                   |       |                                |           |
|-----------------------------------------------------------------------------------|-------------------------------------------|---------------------------------------------------|-------|--------------------------------|-----------|
| UiO-66/ZnIn <sub>2</sub> S <sub>4</sub>                                           | 300 W Xe lamp<br>( $\lambda \geq 400$ nm) | TEOA                                              | 3.062 | 19.39<br>( $\lambda = 400$ nm) | 15        |
| S-Ti <sub>3</sub> C <sub>2</sub> T <sub>x</sub> /ZnIn <sub>2</sub> S <sub>4</sub> | 300 W Xe lamp<br>( $\lambda \geq 400$ nm) | Na <sub>2</sub> S/Na <sub>2</sub> SO <sub>3</sub> | 3.058 | 17.68<br>( $\lambda = 420$ nm) | This work |

- 1 B. Sun, P. Qiu, Z. Liang, Y. Xue, X. Zhang, L. Yang, H. Cui and J. Tian, *Chem. Eng. J.*, 2021, **406**, 127177.
- 2 H. Hou, Y. Yuan, S. Cao, Y. Yang, X. Ye and W. Yang, *J. Mater. Chem. C*, 2020, **8**, 11001-11007.
- 3 Y. Sun, C. Xue, L. Chen, Y. Li, S. Guo, Y. Shen, F. Dong, G. Shao and P. Zhang, *Sol. RRL*, 2021, **5**, 2000722.
- 4 K. Wu, R. Jiang, Y. Zhao, L. Mao, X. Gu, X. Cai and M. Zhu, *J. Colloid Interface Sci.*, 2022, **619**, 339-347.
- 5 G. Zuo, Y. Wang, W. L. Teo, A. Xie, Y. Guo, Y. Dai, W. Zhou, D. Jana, Q. Xian and W. Dong, *Angewandte Chemie*, 2020, **132**, 11383-11388.
- 6 Y. Li, Y. Liu, D. Xing, J. Wang, L. Zheng, Z. Wang, P. Wang, Z. Zheng, H. Cheng and Y. Dai, *Appl. Catal., B*, 2021, **285**, 119855.
- 7 X. Fu, C. Huang, J. Wen, Y. Du and X. Zheng, *Int. J. Hydrogen Energy*, 2021, **46**, 17697-17707.
- 8 L. Liu, J. Liu, W. Yang, J. Wan, F. Fu and D. Wang, *J. Colloid Interface Sci.*, 2022, **608**, 482-492.
- 9 J. Luo, Z. Lin, Y. Zhao, S. Jiang and S. Song, *Chin. J. Catal.*, 2020, **41**, 122-130.
- 10 V. Q. Hieu, T. C. Lam, A. Khan, T.-T. T. Vo, T.-Q. Nguyen, V. D. Doan and V. A. Tran, *Chemosphere*, 2021, **285**, 131429.
- 11 K. Huang, C. Li and X. Meng, *J. Colloid Interface Sci.*, 2020, **580**, 669-680.
- 12 Y. Zhu, J. Chen, L. Shao, X. Xia, Y. Liu and L. Wang, *Appl. Catal., B*, 2020, **268**, 118744.
- 13 S. Zhang, M. Du, Z. Xing, Z. Li, K. Pan and W. Zhou, *Appl. Catal., B*, 2020, **262**, 118202.
- 14 Y. Wang, D. Chen, Y. Hu, L. Qin, J. Liang, X. Sun and Y. Huang, *Sustainable Energy Fuels*, 2020, **4**, 1681-1692.
- 15 X. Peng, L. Ye, Y. Ding, L. Yi, C. Zhang and Z. Wen, *Appl. Catal., B*, 2020, **260**, 118152.
